# Supplementary material for: Prion-like Domains in Spike Protein of SARS-CoV-2 Differ across Its Variants and Enable Changes in Affinity to ACE2
Source: MDPI journal article supplement (doi:10.3390/microorganisms10020280), 2022-01-25
Supplement: s1 [file s1]

Supplementary Materials

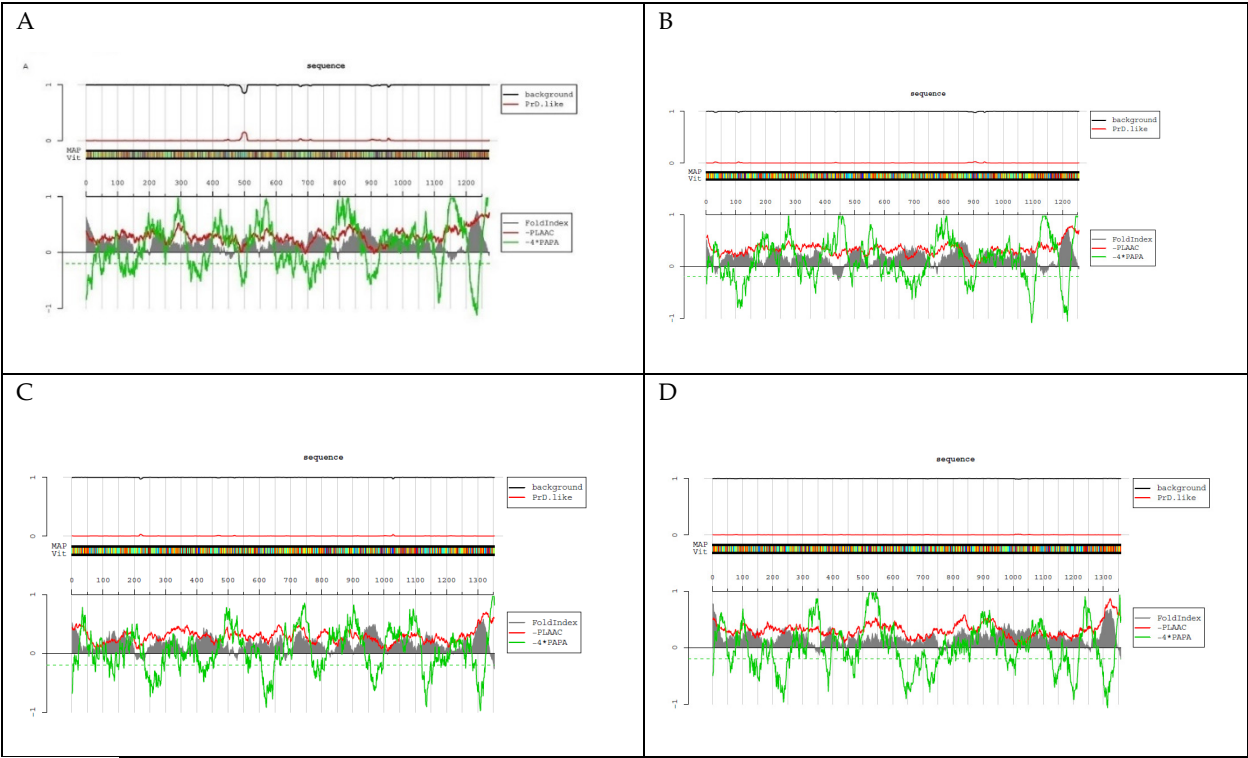

**Figure S1.** The LLR value of the S protein from (A) SARS-CoV-2 (LLR 4.856), (B) SARS-CoV (LLR 4.426), (C) MERS-CoV (LLR 4.49) and (D) HCoV-OC43 (LLR 2.828).

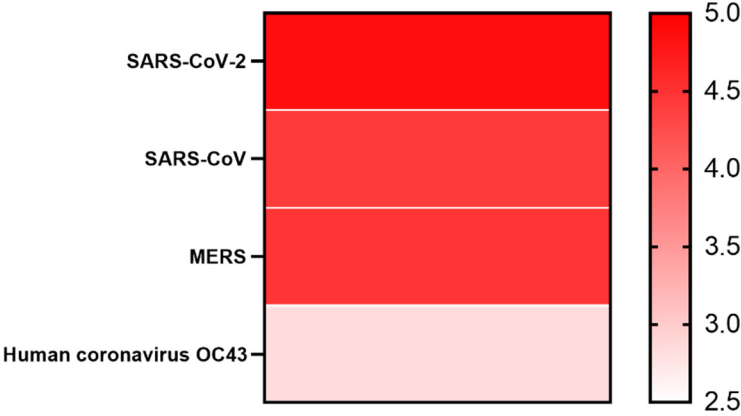

**Figure S2.** Heatmap of PrD distribution in S proteins in  $\beta$ -CoVs. Cells indexed by rows and columns are marked using a color gradient, ranging from white (LLR < 3.0) to saturated red (LLR = 5). The results were analyzed using one-way ANOVA.

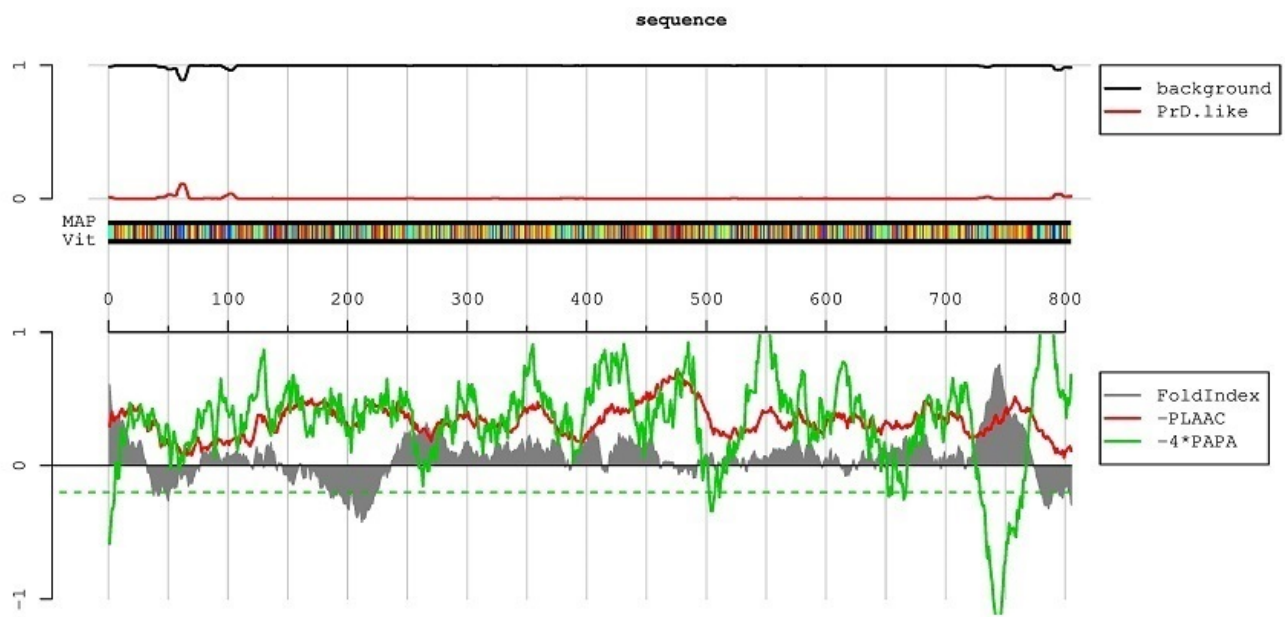

**Figure S3.** Graphical representation of the LLR score (LLR score 4.220) of PrDs in the ACE2 protein.

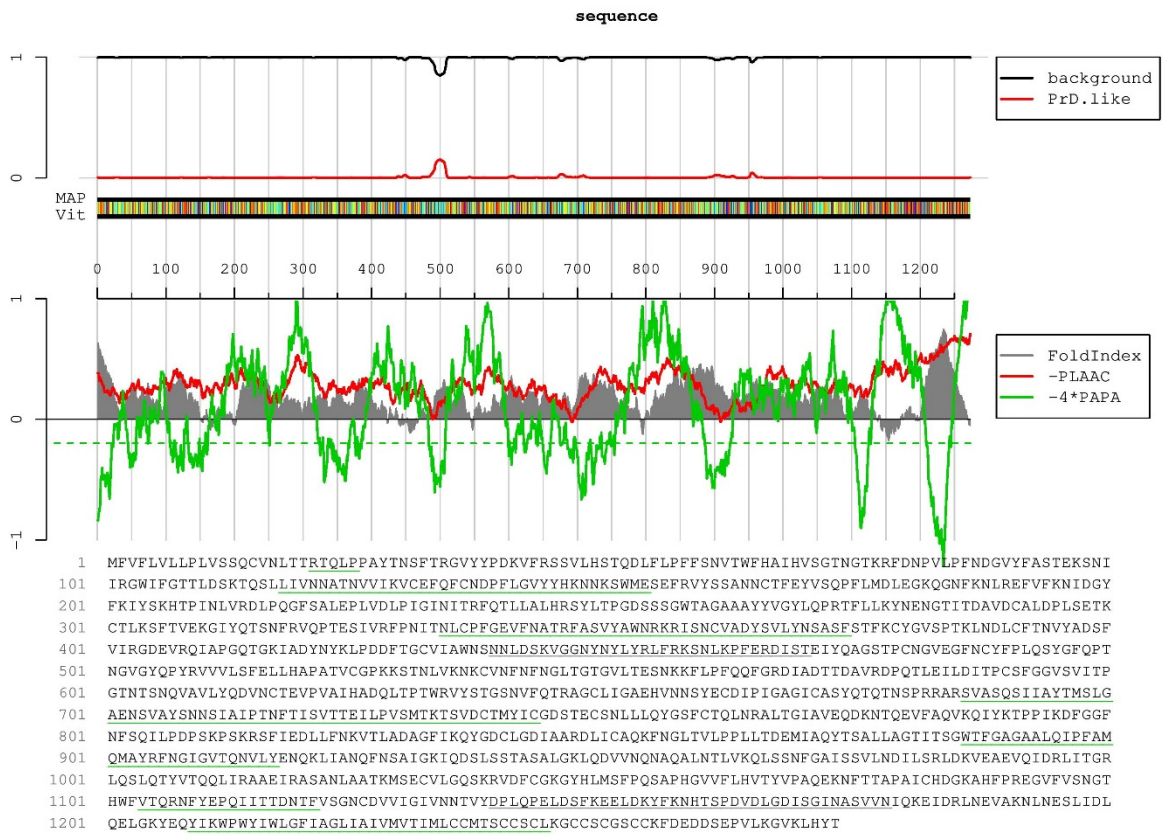

A

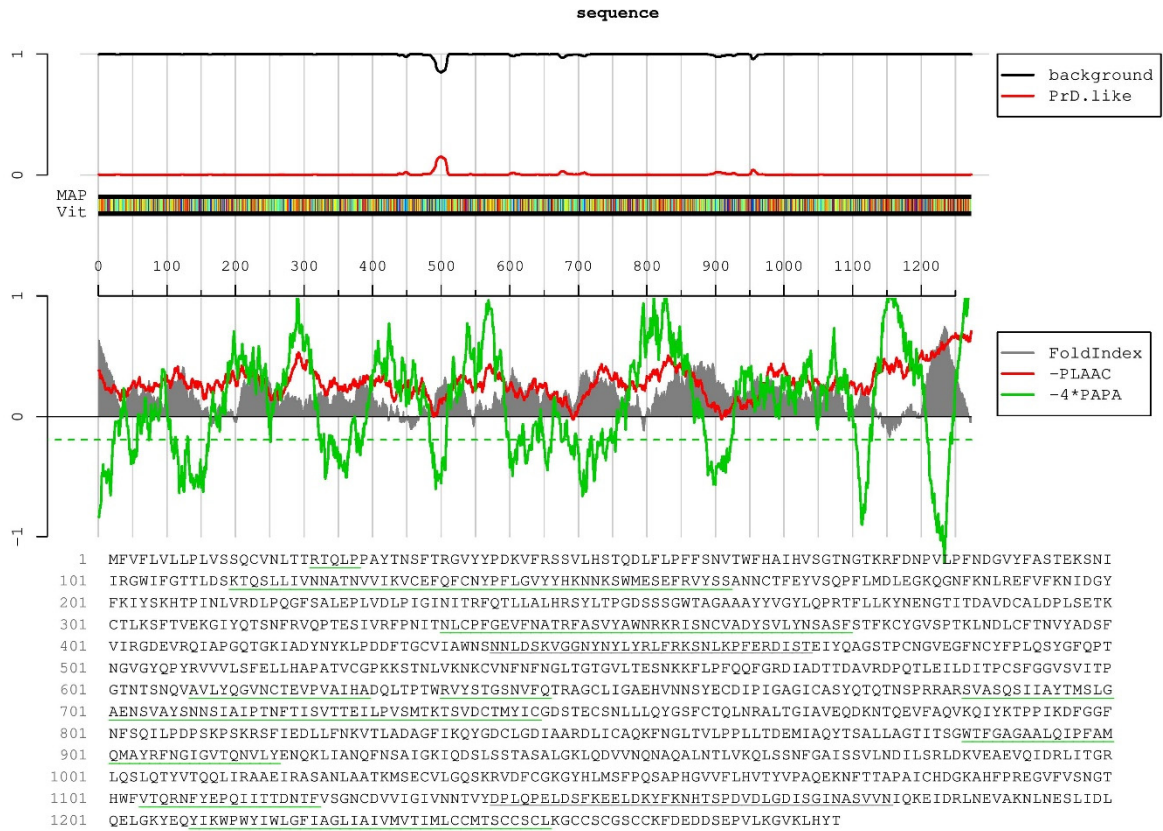

B

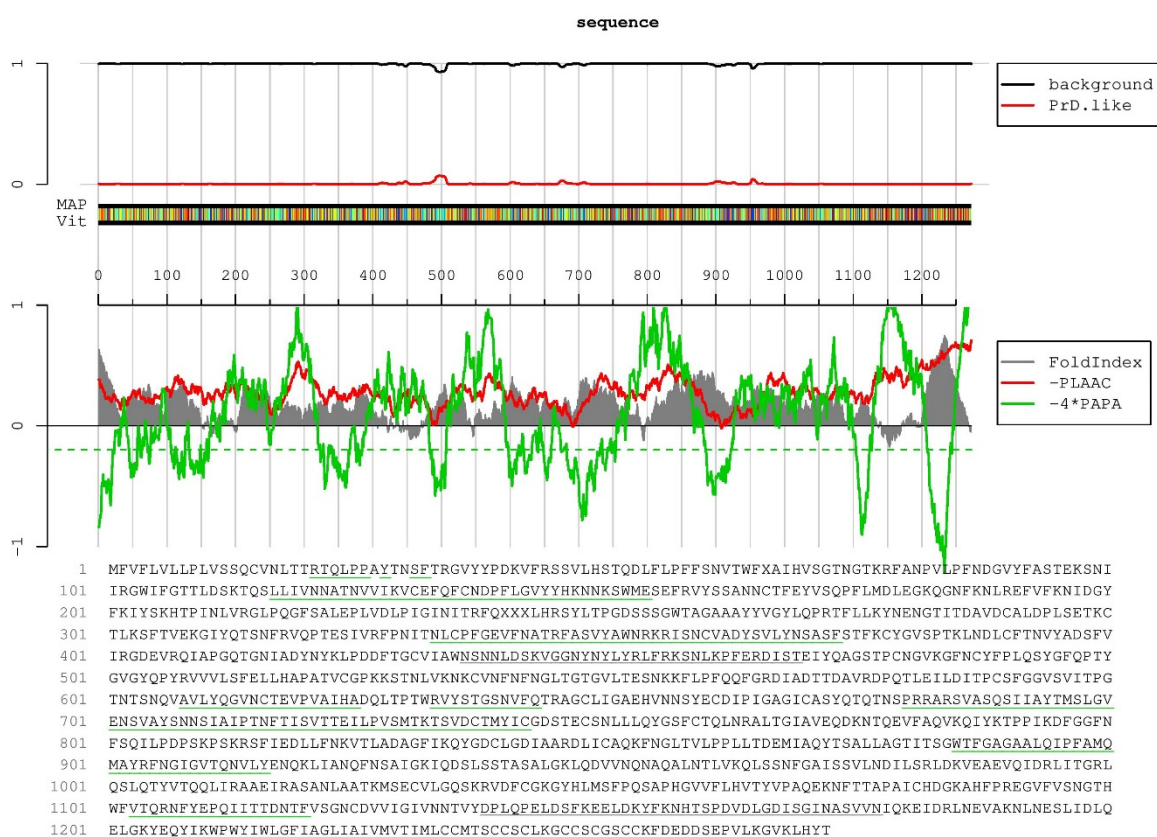

C

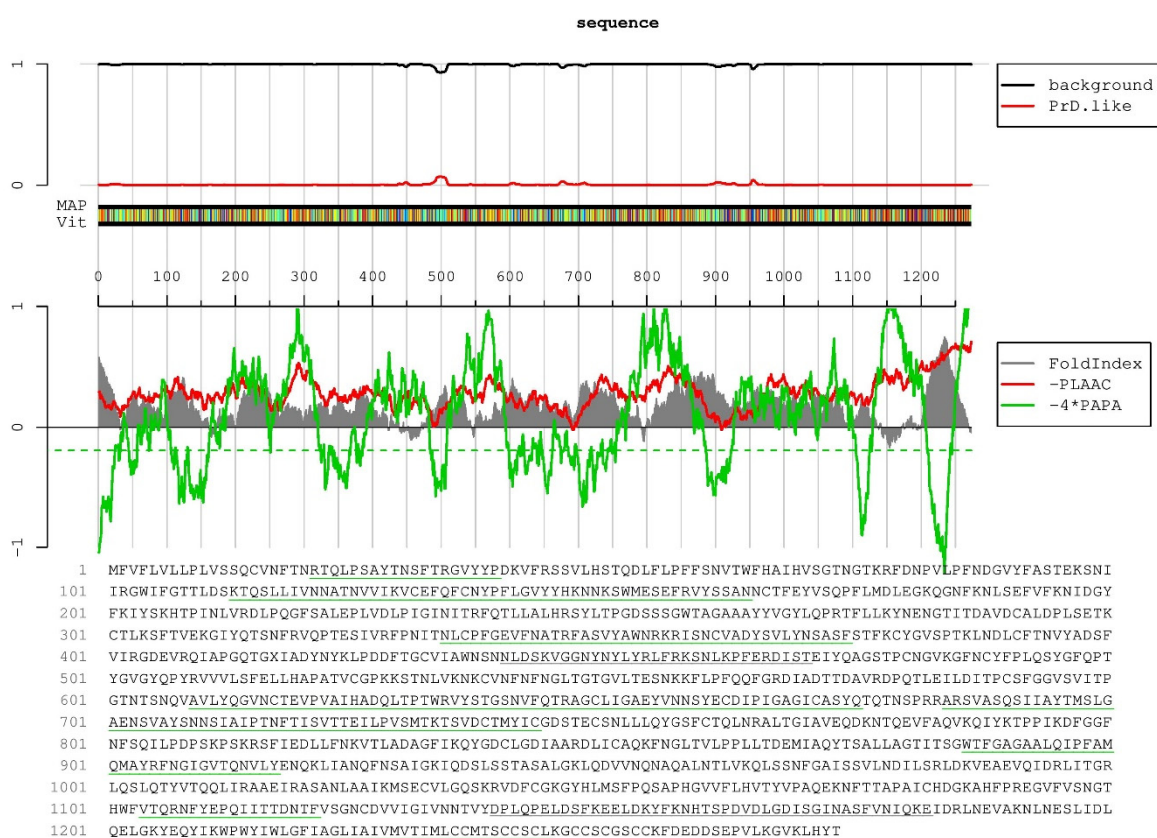

D



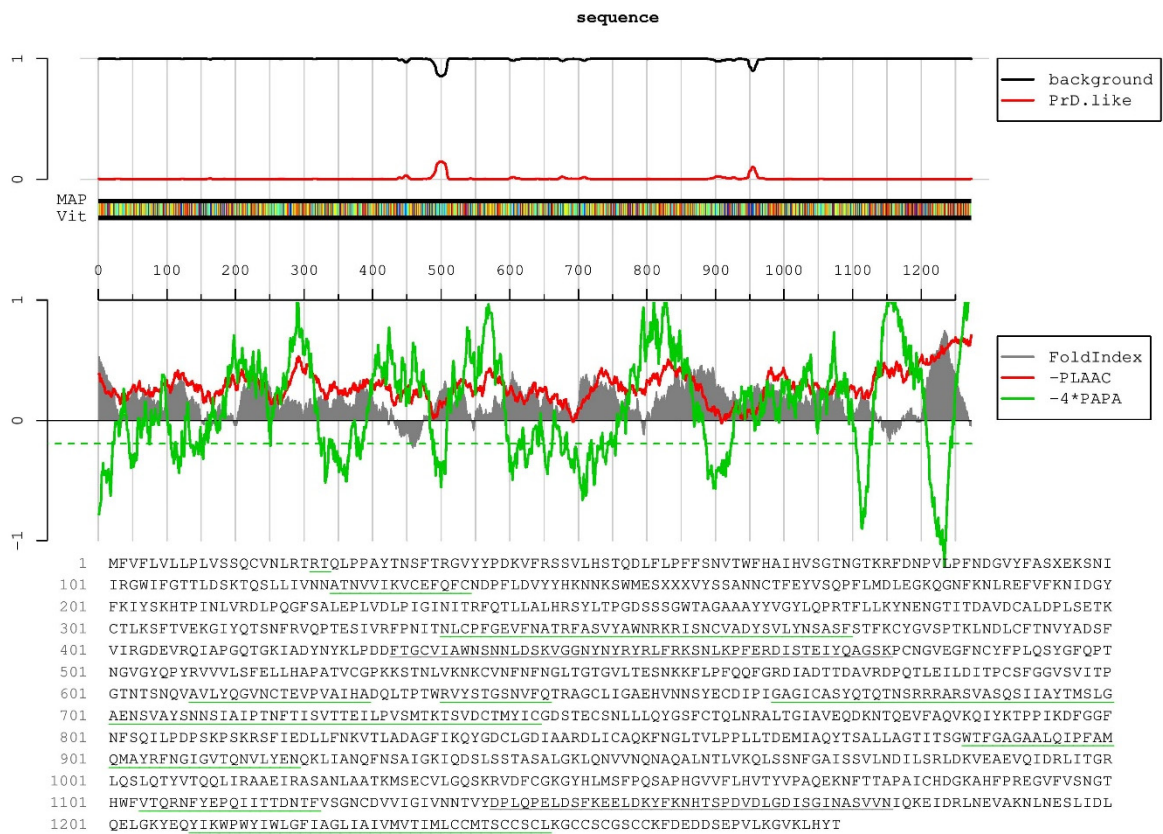

E

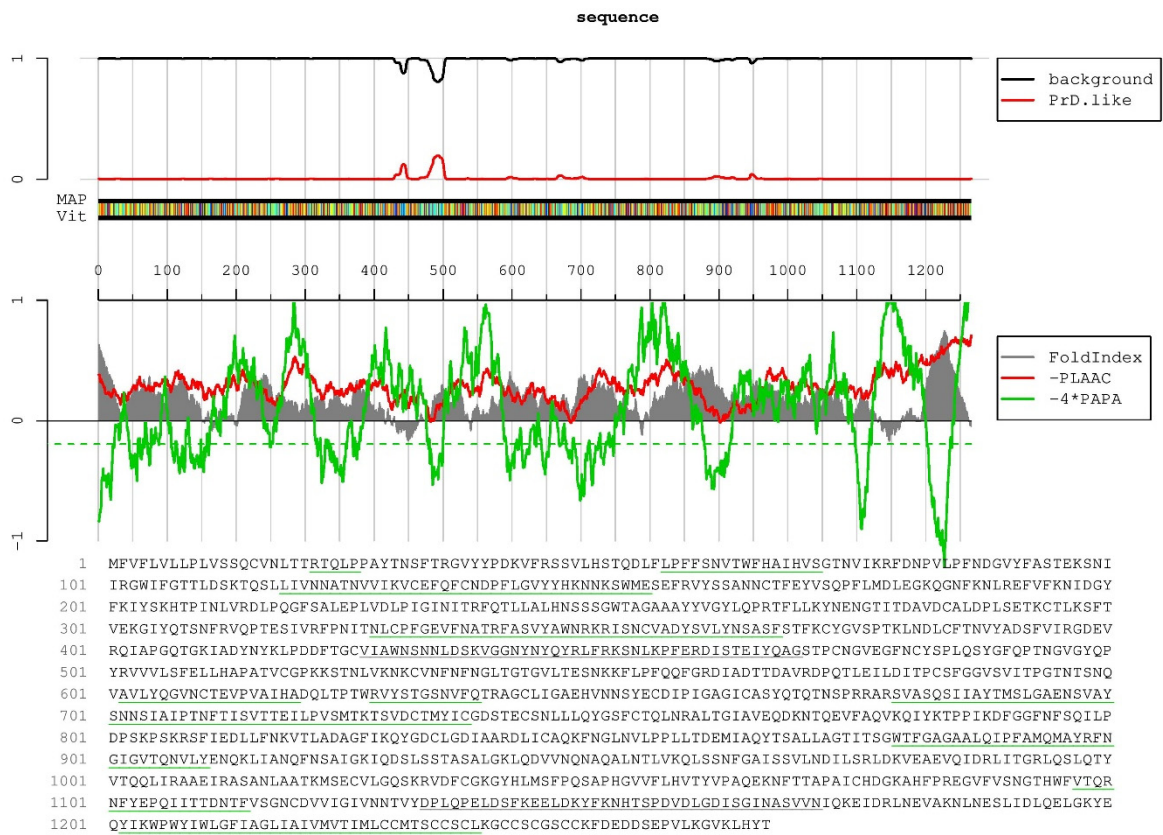

F

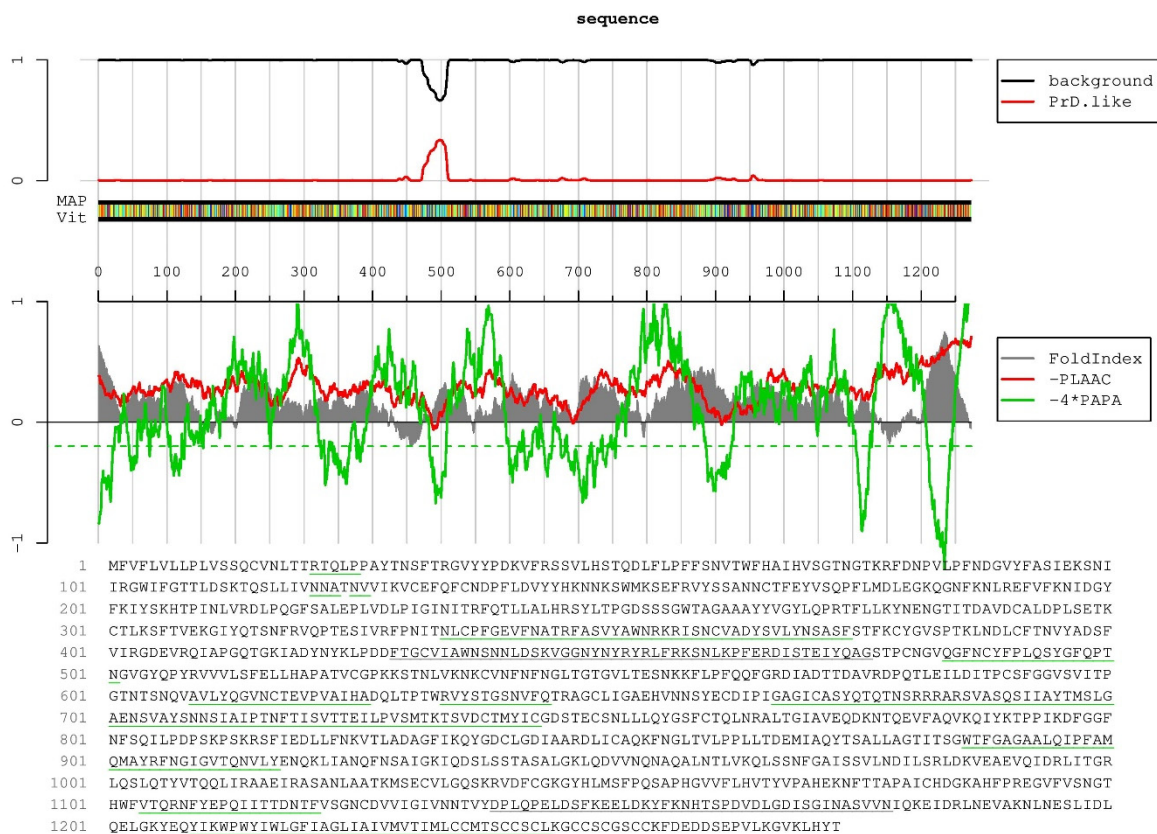

G

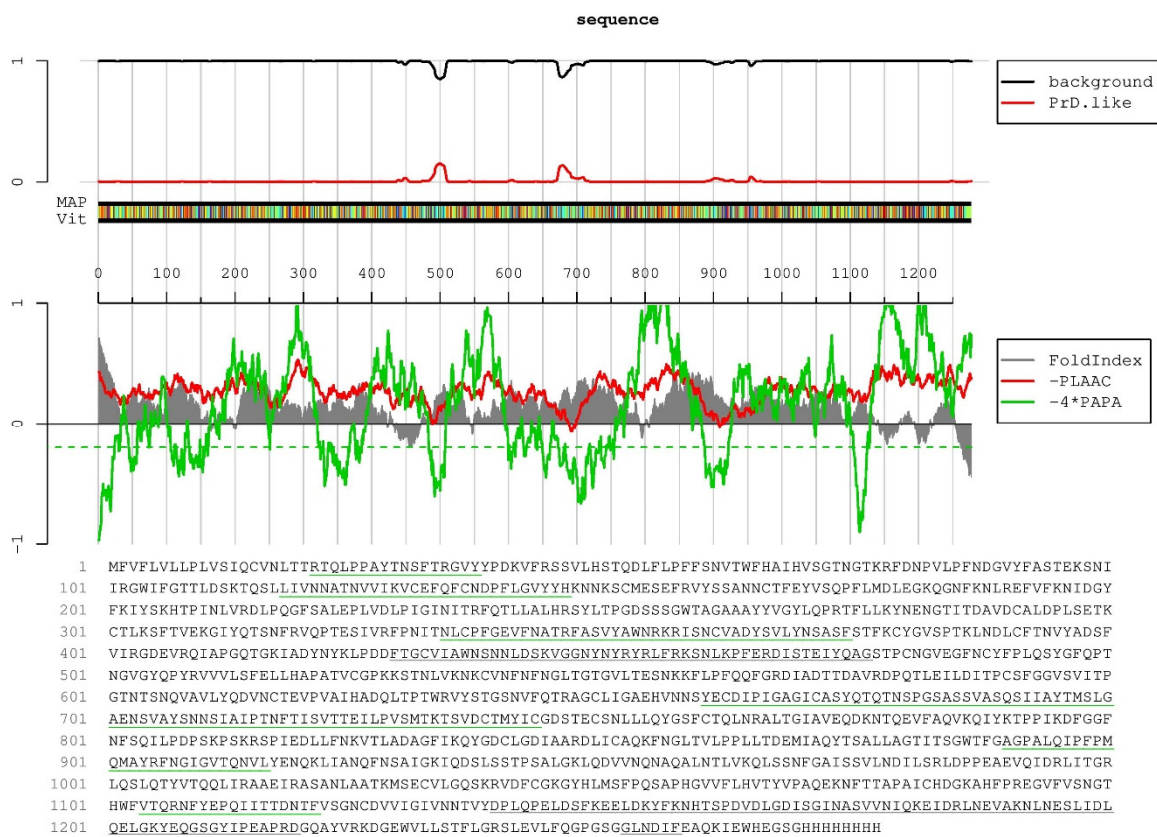

H

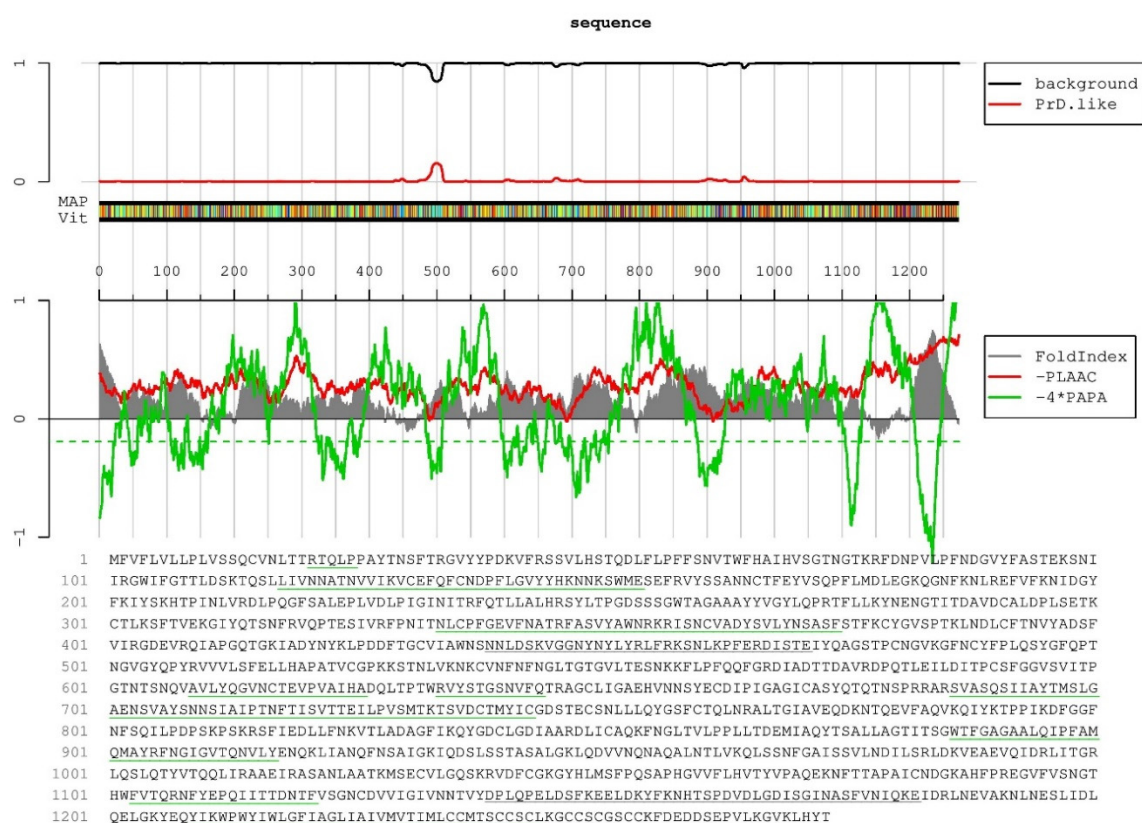

I

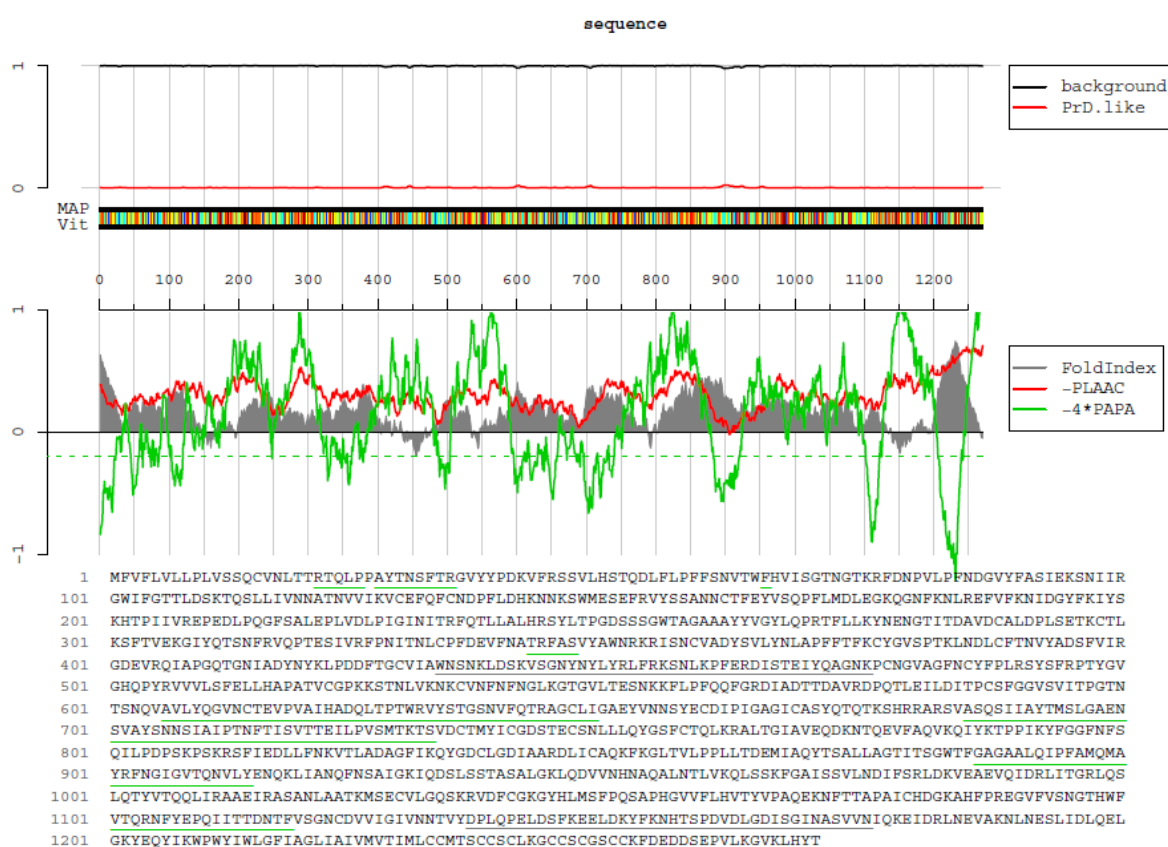

J

**Figure S4.** Graphical representation of the LLR score in the PrDs of the S protein from different SARS-CoV-2 variants (A–J). The different variants are shown within each of the subfigures.
